# Supplementary material for: Enhancing hydrogen adsorption on SnS 2 and SnSe 2 monolayers: alkali and alkaline earth metal decoration under external electric fields
Source: Royal Society of Chemistry journal article supplement (doi:10.1039/d5cp03873a), 2025-01-01
Supplement: d5cp03873a1.pdf [file d5cp03873a1.pdf]

## **Enhancing Hydrogen Adsorption on SnS<sub>2</sub> and SnSe<sub>2</sub> Monolayers: Alkali and Alkaline Earth Metal Decoration Under External Electric Fields**

(Supplementary Information)

Audomsak Sriphothongnack,<sup>a</sup> Watcharin Teeranattapong,<sup>a</sup> Supparat Charoenphon,<sup>a</sup> Adisak Boonchun,<sup>a</sup> Thanayut Kaewmayara,<sup>b</sup> and Pakpoom Reunchan<sup>a\*</sup>

*<sup>a</sup>Department of Physics, Faculty of Science, Kasetsart University, Bangkok 10900, Thailand*

*<sup>b</sup>Department of Physics, Faculty of Science, Khon Kaen University, Mueang Khon Kaen, Khon Kaen 40002, Thailand*

\*Email: pakpoom.r@ku.ac.th

### A. Phonon dispersion of SnS<sub>2</sub> and SnSe<sub>2</sub> monolayers

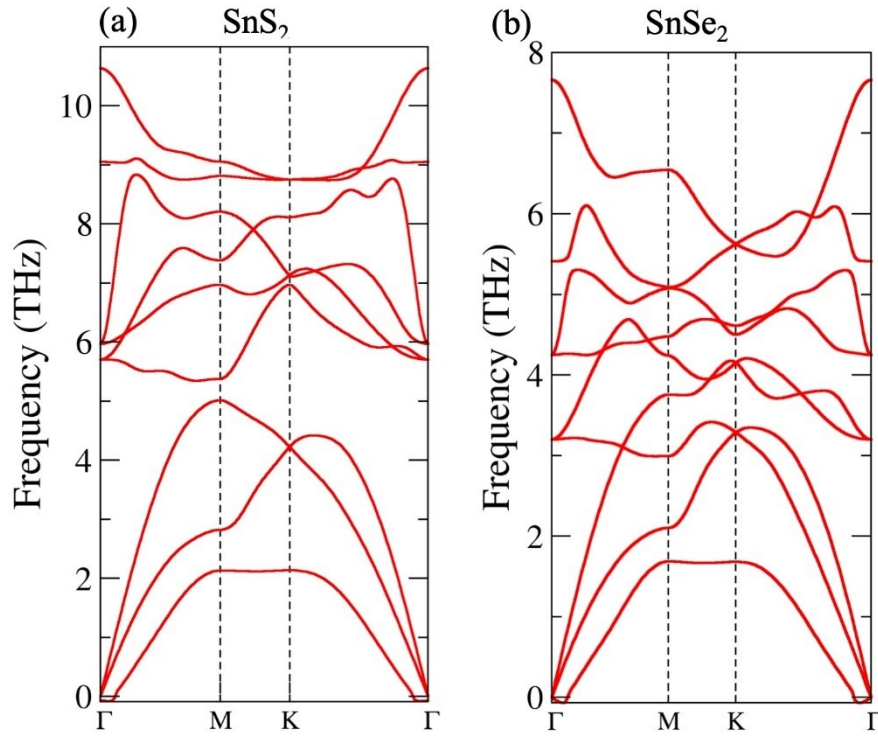

**Fig. S1** Phonon dispersion spectra of (a) SnS<sub>2</sub> and (b) SnSe<sub>2</sub> monolayers. Both systems exhibit no significant imaginary frequencies across the Brillouin zone, confirming their dynamical stability. The minor negative frequency observed near the  $\Gamma$  point is attributed to numerical artifacts that can arise from factors such as the finite supercell size, the choice of pseudopotentials, or the convergence thresholds. Such minor deviations are common in first-principles phonon calculations and do not affect the conclusion that SnS<sub>2</sub> and SnSe<sub>2</sub> monolayers are dynamically stable. Similar behavior has been reported for SnSe<sub>2</sub><sup>1</sup> and other 2D materials in the literature.<sup>2</sup>

## B. Numerical values of binding energies and cohesive energies

**Table S1** Calculated binding energies (in eV) of Li, Na, K, Mg, and Ca atoms on SnS<sub>2</sub> and SnSe<sub>2</sub> monolayers at the M and J adsorption sites. The cohesive energy ( $E_{\text{coh}}$ ) of each metal atom is also listed for comparison.

| Metal | $E_{\text{coh}}$ | SnS <sub>2</sub> |        | SnSe <sub>2</sub> |        |
|-------|------------------|------------------|--------|-------------------|--------|
|       |                  | M-site           | J-site | M-site            | J-site |
| Li    | -1.669           | -2.837           | -2.847 | -2.947            | -2.961 |
| Na    | -1.185           | -2.360           | -2.365 | -2.468            | -2.434 |
| K     | -0.857           | -2.577           | -2.568 | -2.676            | -2.673 |
| Mg    | -1.692           | -2.280           | -1.762 | -2.564            | -2.239 |
| Ca    | -1.991           | -3.799           | -3.332 | -3.950            | -3.684 |

**Table S2** Calculation of formation energies (in eV) of Li, Na, K, Mg, and Ca on SnS<sub>2</sub> and SnSe<sub>2</sub> monolayers at the M and J adsorption sites

| Metal | SnSe <sub>2</sub> |        | SnS <sub>2</sub> |        |
|-------|-------------------|--------|------------------|--------|
|       | M-site            | J-site | M-site           | J-site |
| Li    | -1.278            | -1.292 | -0.877           | -1.178 |
| Na    | -1.284            | -1.249 | -0.860           | -1.181 |
| K     | -1.819            | -1.815 | -1.451           | -1.711 |
| Mg    | -0.872            | -0.546 | -0.320           | -0.069 |
| Ca    | -1.959            | -1.694 | -1.523           | -1.341 |

### C. Atomic structure and charge difference of pristine and metal-decorated SnSe<sub>2</sub>

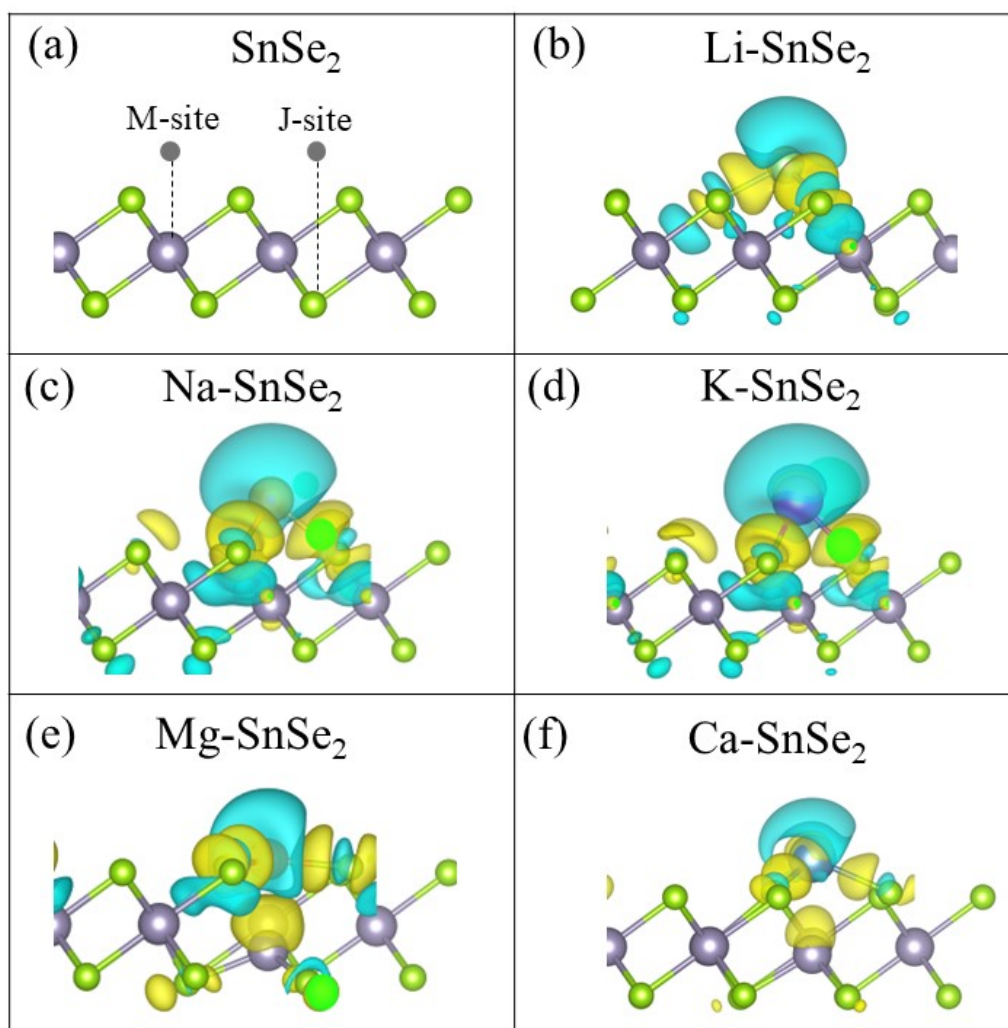

**Fig. S2** Optimized atomic structures and charge difference distributions for pristine and metal-decorated SnS<sub>2</sub> monolayers. (a) Pristine SnSe<sub>2</sub> monolayer showing the two potential adsorption sites: the M site (above the Sn atom) and the J site (above the lower-layer S atom). Panels (b–f) show the optimized structures of SnSe<sub>2</sub> with adsorbed Li, Na, K, Mg, and Ca atoms, respectively, occupying the M site. The overlaid charge difference maps depict regions of charge accumulation (yellow) and charge depletion (blue), illustrating the redistribution of electron density upon metal adsorption.

#### D. Ab-Initio Molecular Dynamics (AIMD) simulations for single-metal decoration

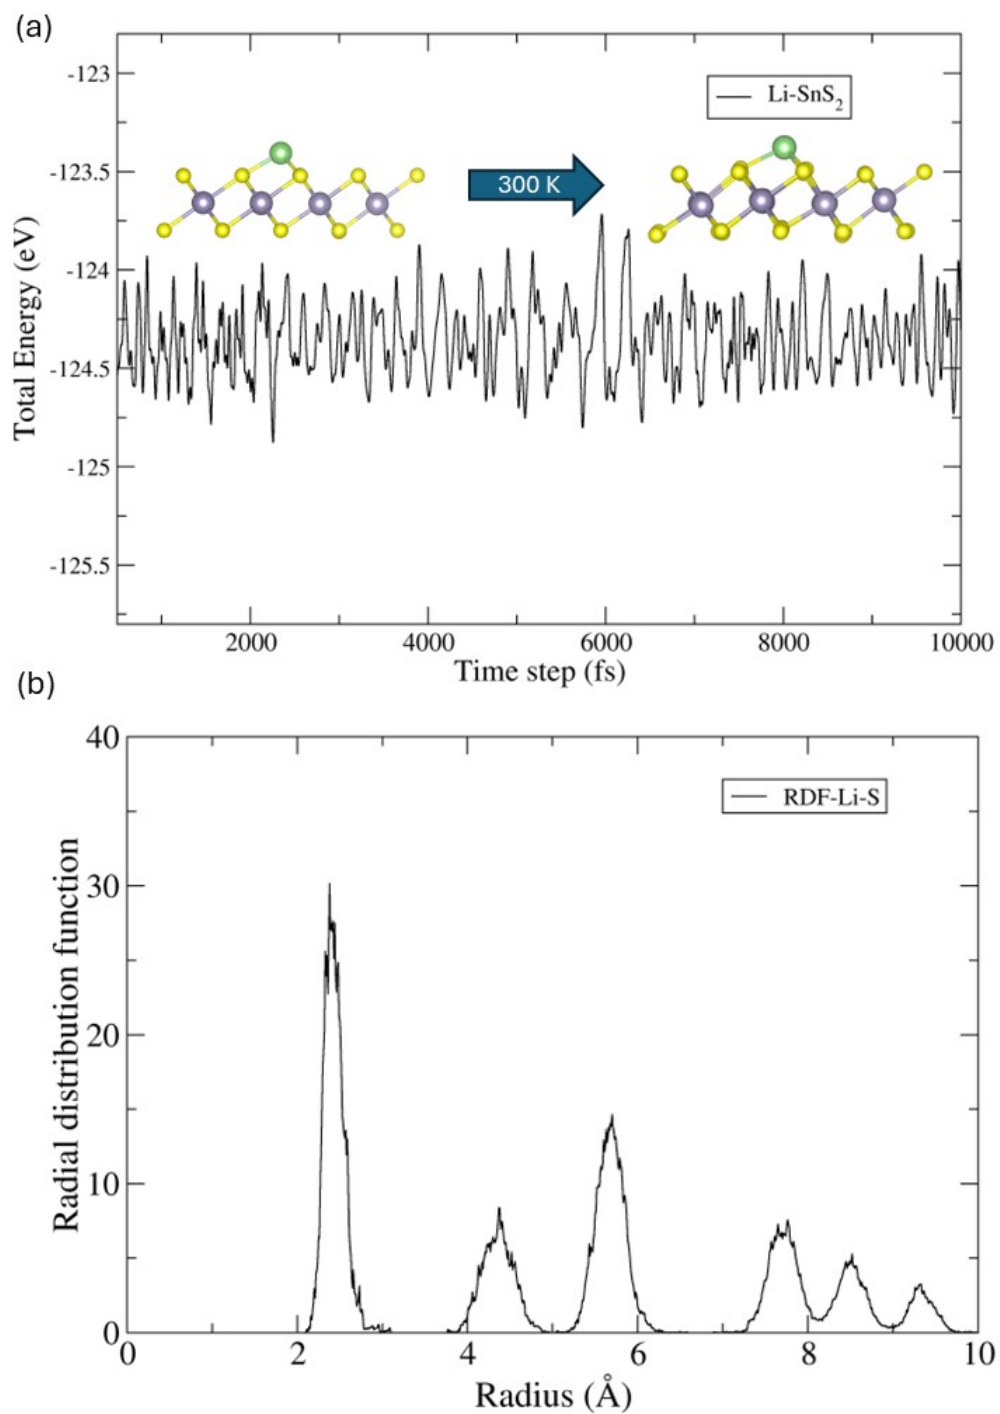

**Fig. S3** (a) shows the results of Ab Initio Molecular Dynamics (AIMD) simulations for the Li-SnS<sub>2</sub> system, whereas Figure (b) illustrates the radial distribution function between Li and S atoms.

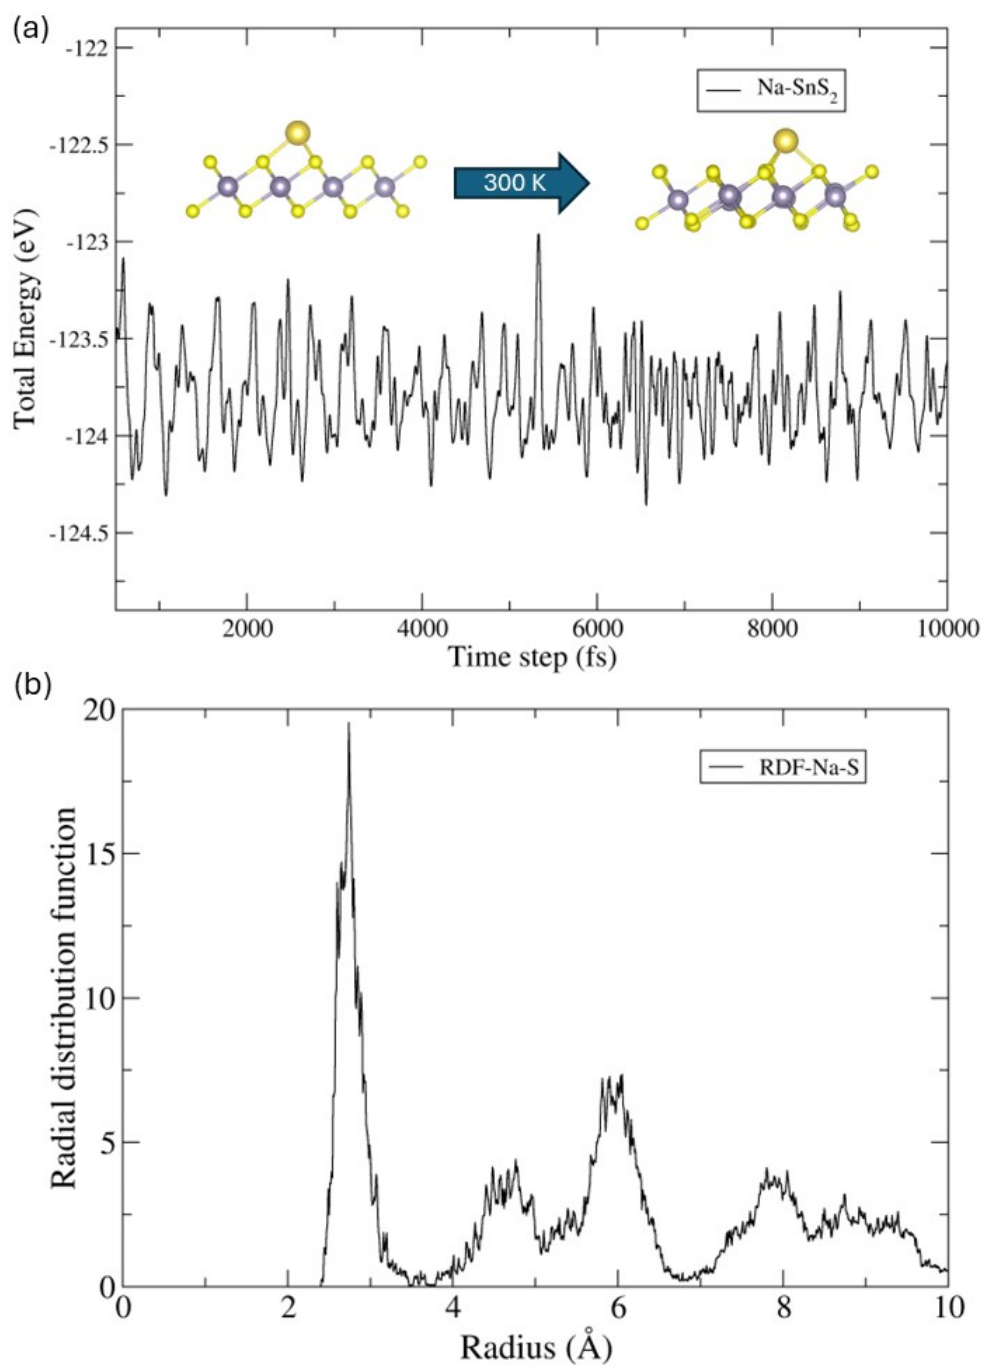

**Fig. S4** (a) shows the results of Ab Initio Molecular Dynamics (AIMD) simulations for the Na–SnS<sub>2</sub> system, whereas Figure (b) illustrates the radial distribution function between Na and S atoms.

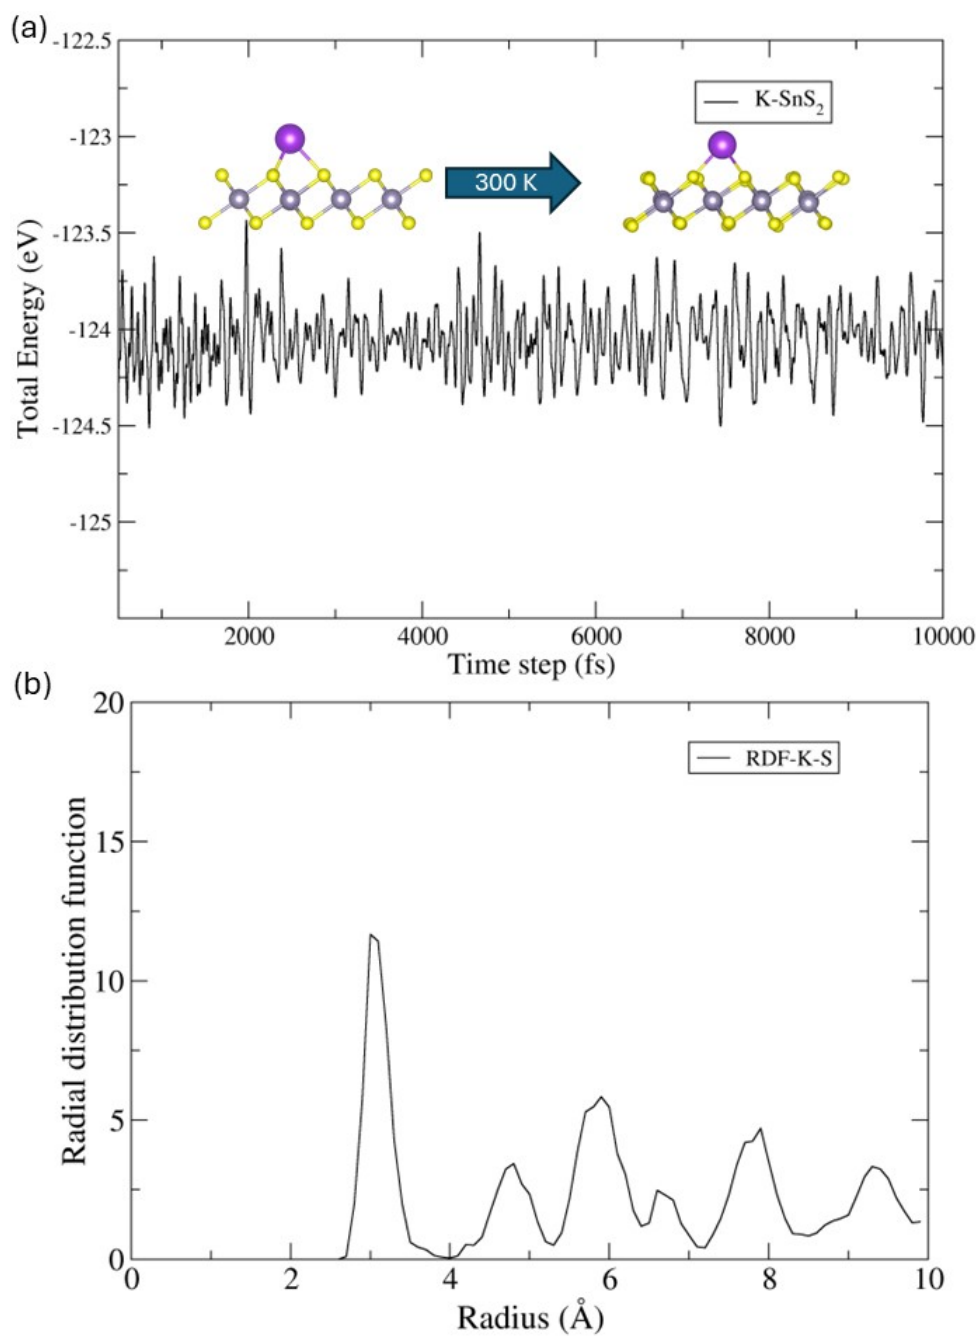

**Fig. S5** (a) shows the results of Ab Initio Molecular Dynamics (AIMD) simulations for the K–SnS<sub>2</sub> system, whereas Figure (b) illustrates the radial distribution function between K and S atoms.

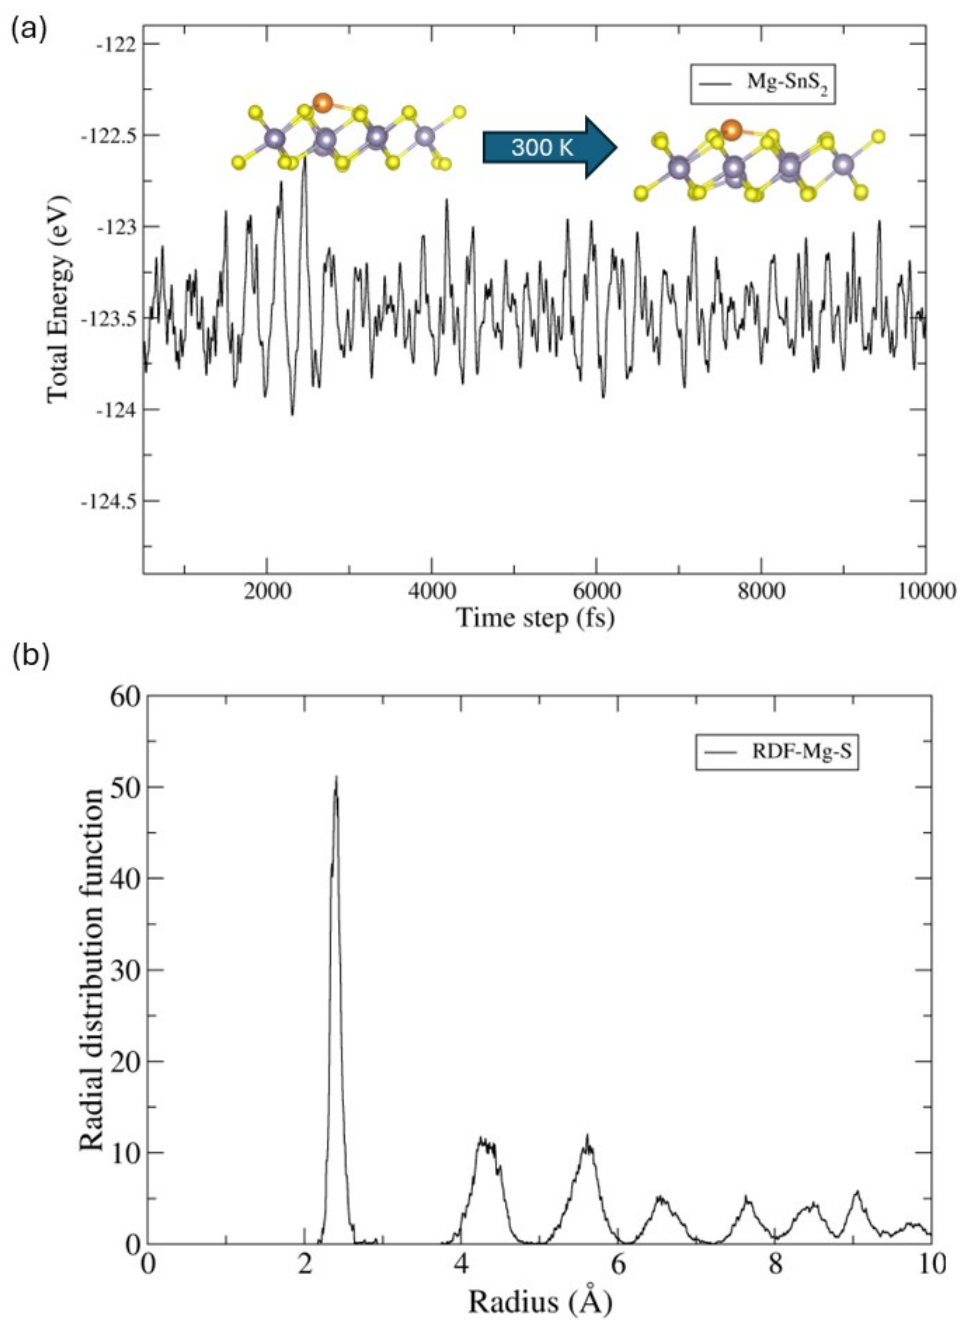

**Fig. S6** (a) shows the results of Ab Initio Molecular Dynamics (AIMD) simulations for the Mg–SnS<sub>2</sub> system, whereas Figure (b) illustrates the radial distribution function between Mg and S atoms.



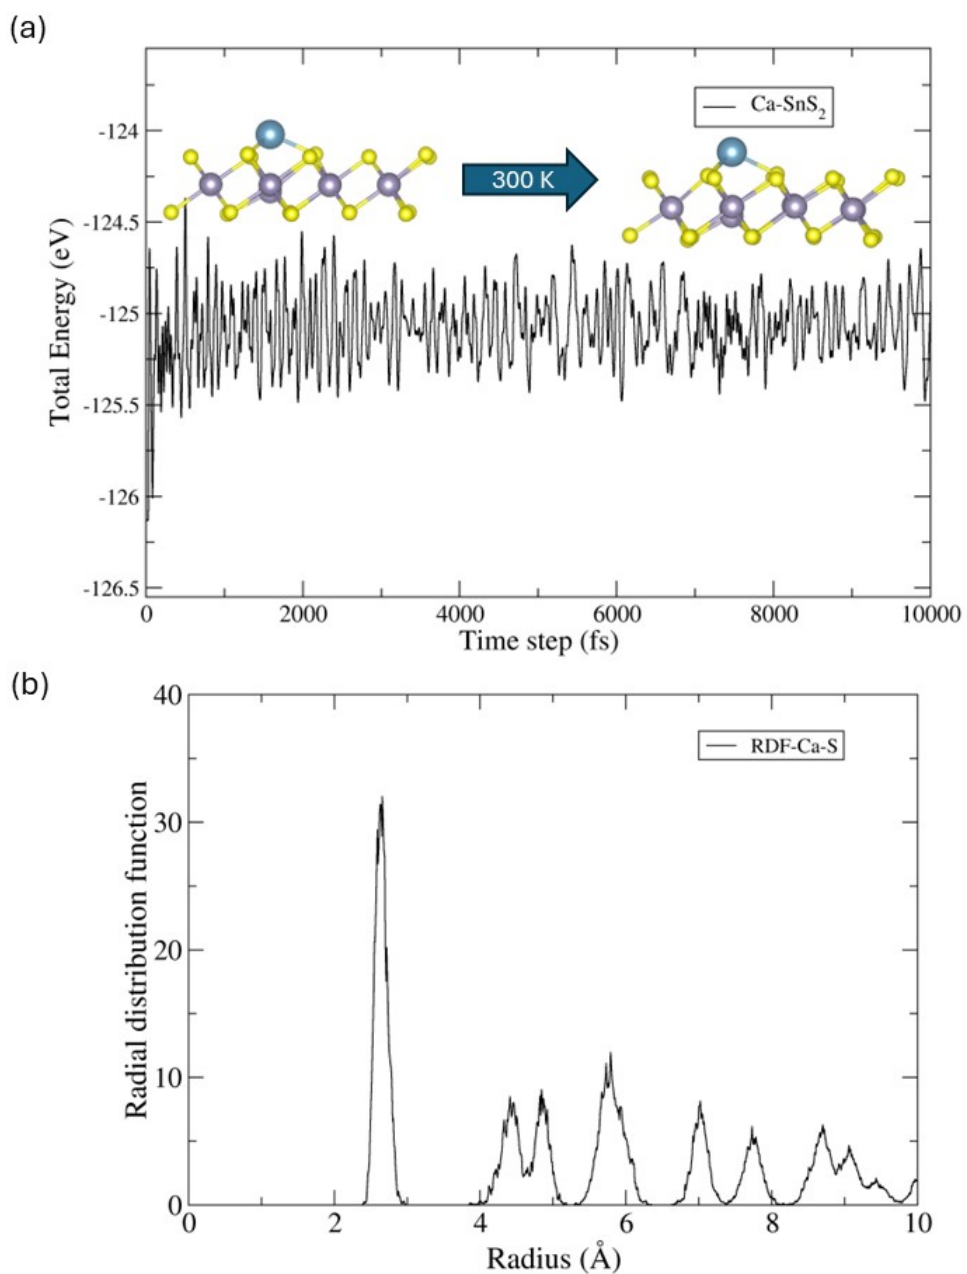

**Fig. S7** (a) shows the results of Ab Initio Molecular Dynamics (AIMD) simulations for the Ca-SnS<sub>2</sub> system, whereas Figure (b) illustrates the radial distribution function between Ca and S atoms.

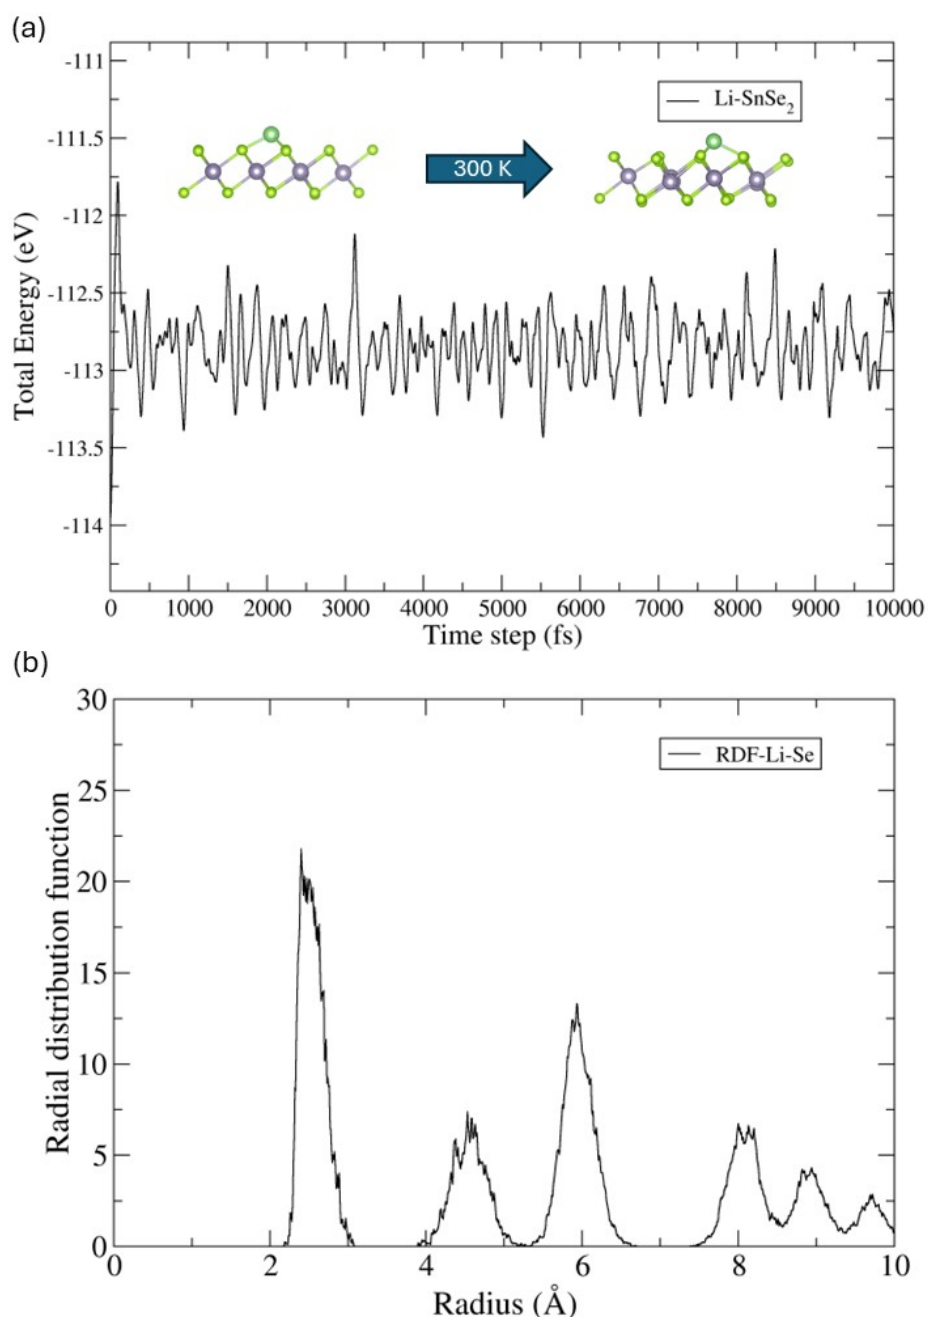

**Fig. S8** (a) shows the results of Ab Initio Molecular Dynamics (AIMD) simulations for the Li-SnSe<sub>2</sub> system, whereas Figure (b) illustrates the radial distribution function between Li and S atoms.

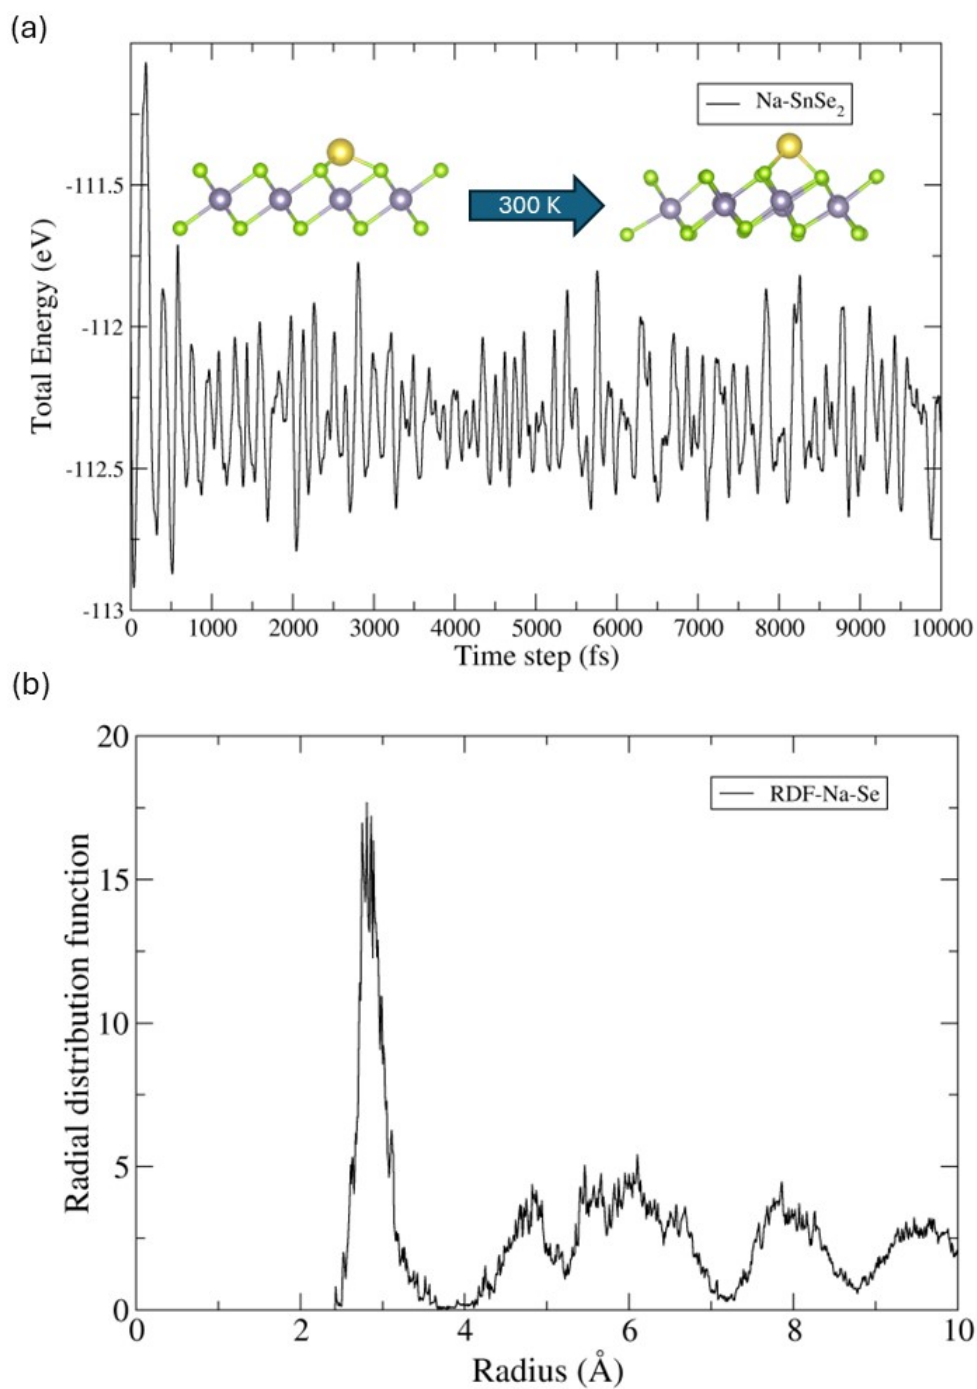

**Fig. S9** (a) shows the results of Ab Initio Molecular Dynamics (AIMD) simulations for the Na-SnSe<sub>2</sub> system, whereas Figure (b) illustrates the radial distribution function between Na and Se atoms.

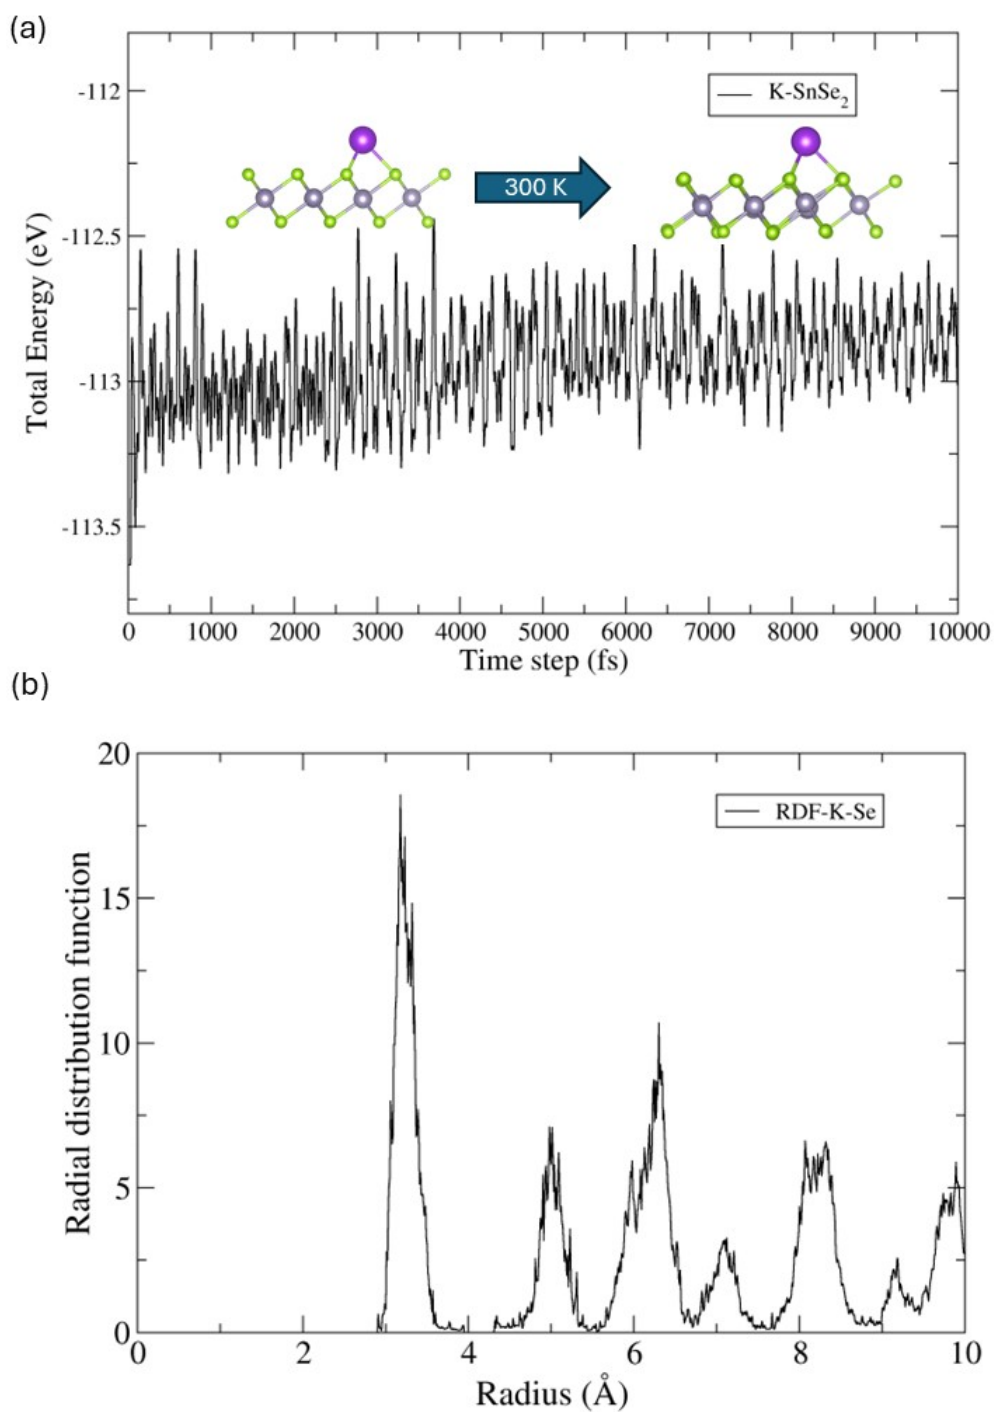

**Fig. S10** (a) shows the results of Ab Initio Molecular Dynamics (AIMD) simulations for the K–SnSe<sub>2</sub> system, whereas Figure (b) illustrates the radial distribution function between K and Se atoms.

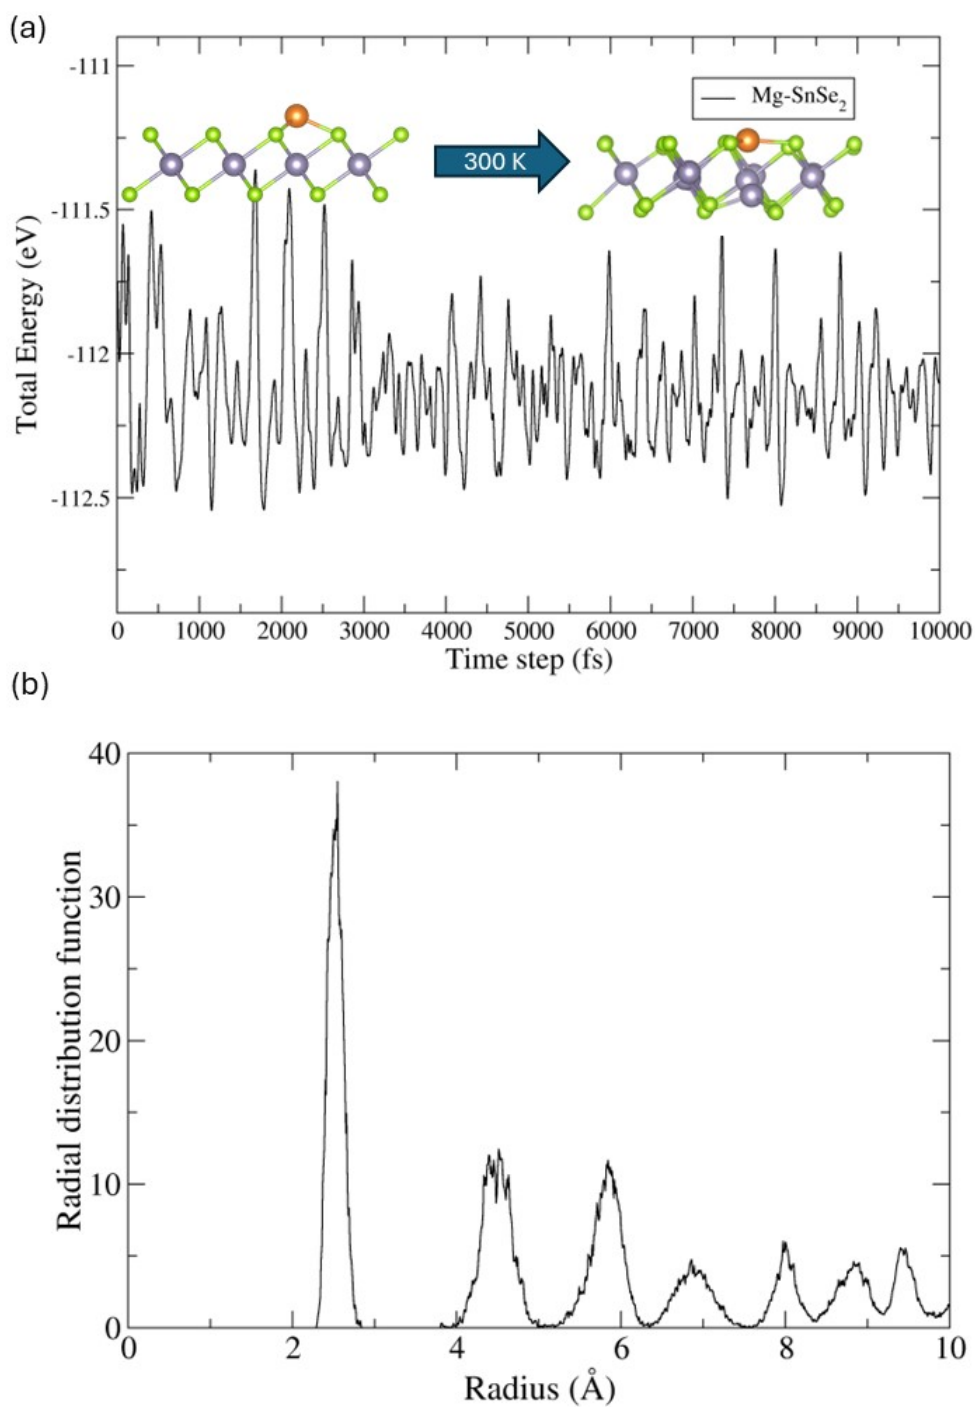

**Fig. S11** (a) shows the results of Ab Initio Molecular Dynamics (AIMD) simulations for the Mg-SnSe<sub>2</sub> system, whereas Figure (b) illustrates the radial distribution function between Mg and Se atoms.

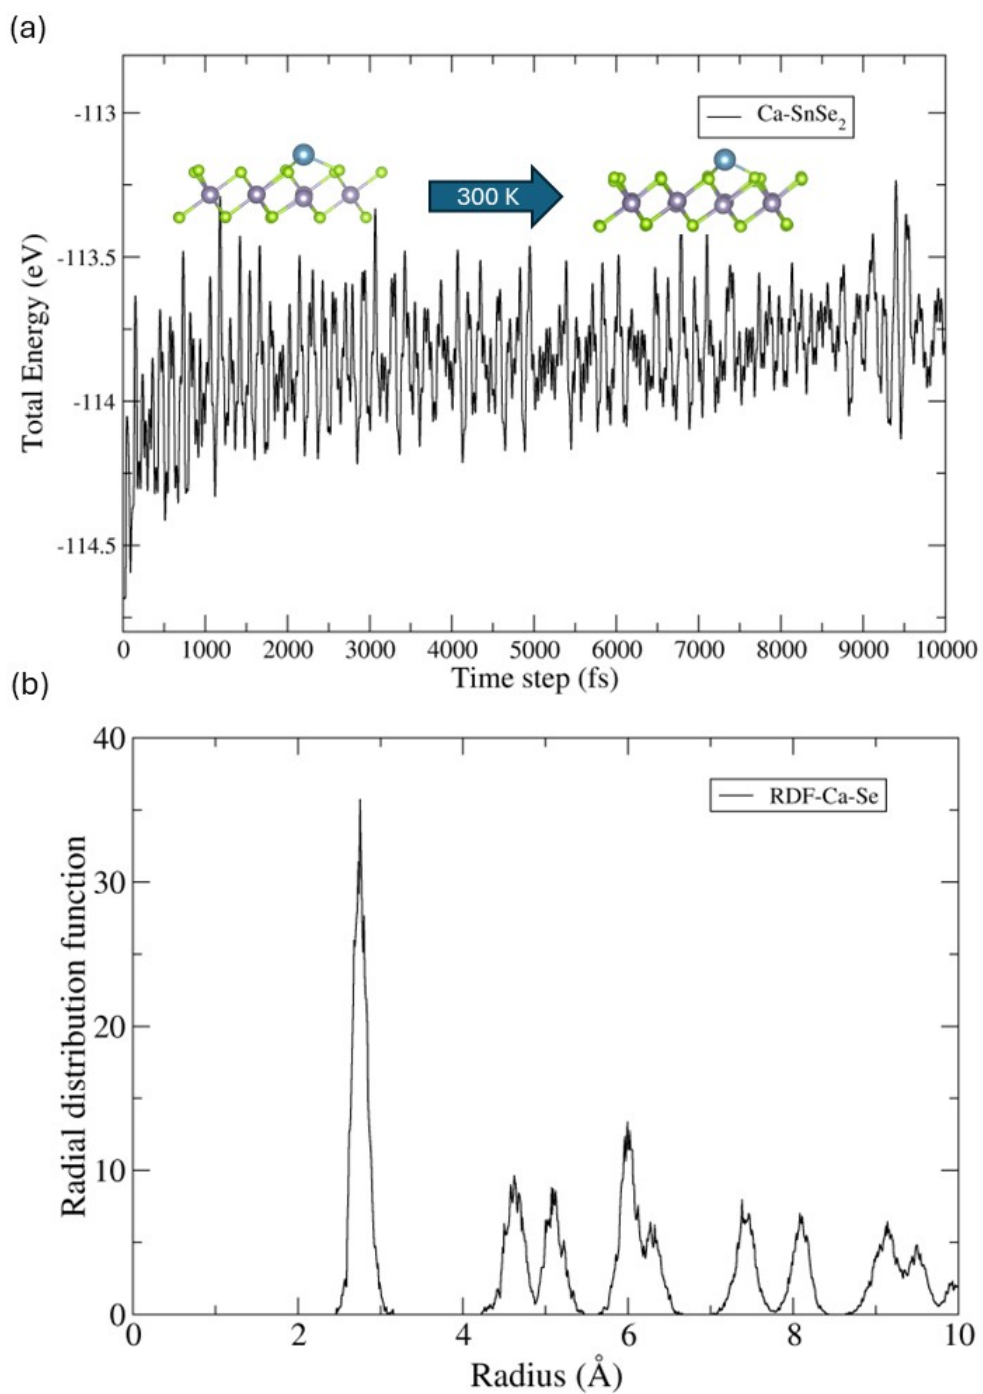

**Fig. S12** (a) shows the results of Ab Initio Molecular Dynamics (AIMD) simulations for the Ca-SnSe<sub>2</sub> system, whereas Figure (b) illustrates the radial distribution function between Ca and Se atoms.

(a)

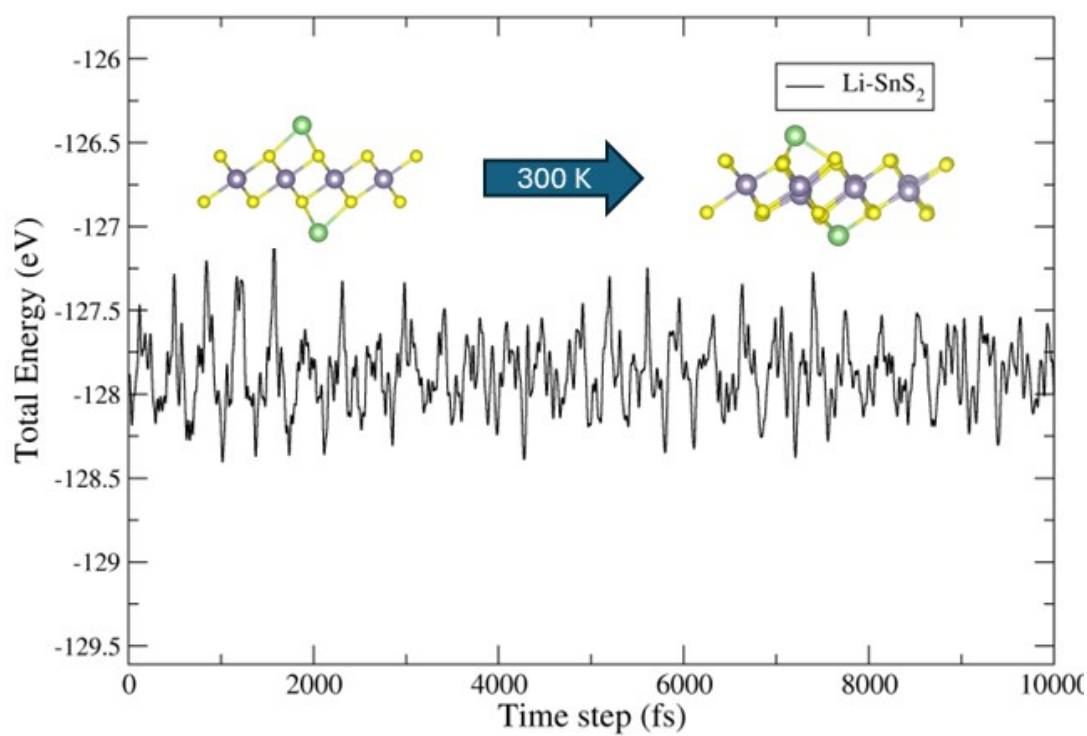

(b)

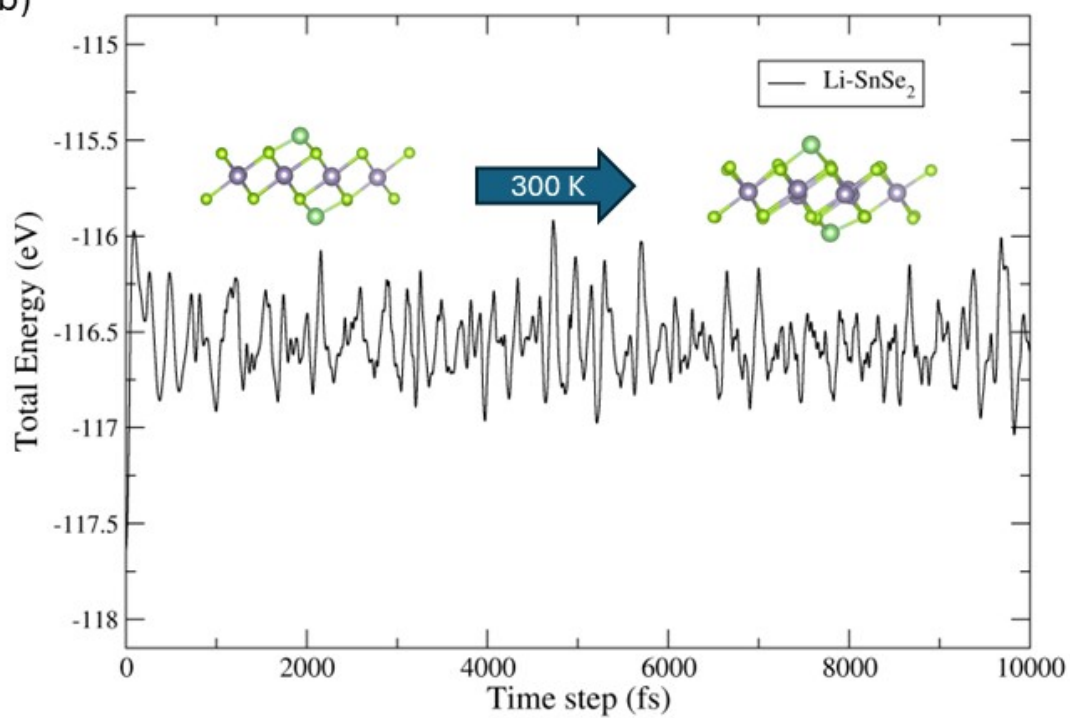

**Fig. S13** AIMD simulations for Li-SnS<sub>2</sub> (a) and Li-SnSe<sub>2</sub> (b) at 300 K under an external electric field of  $-0.5 \text{ V/\AA}$  showing stable energy fluctuation and preserved structural integrity over 10 ps.

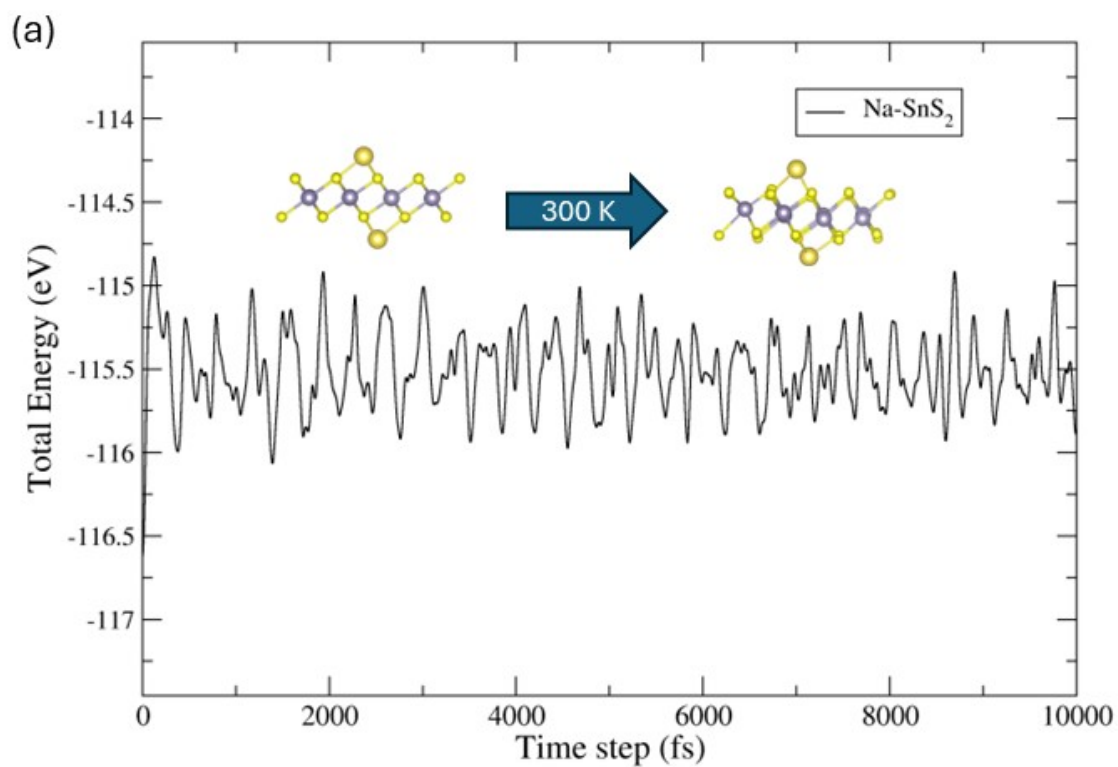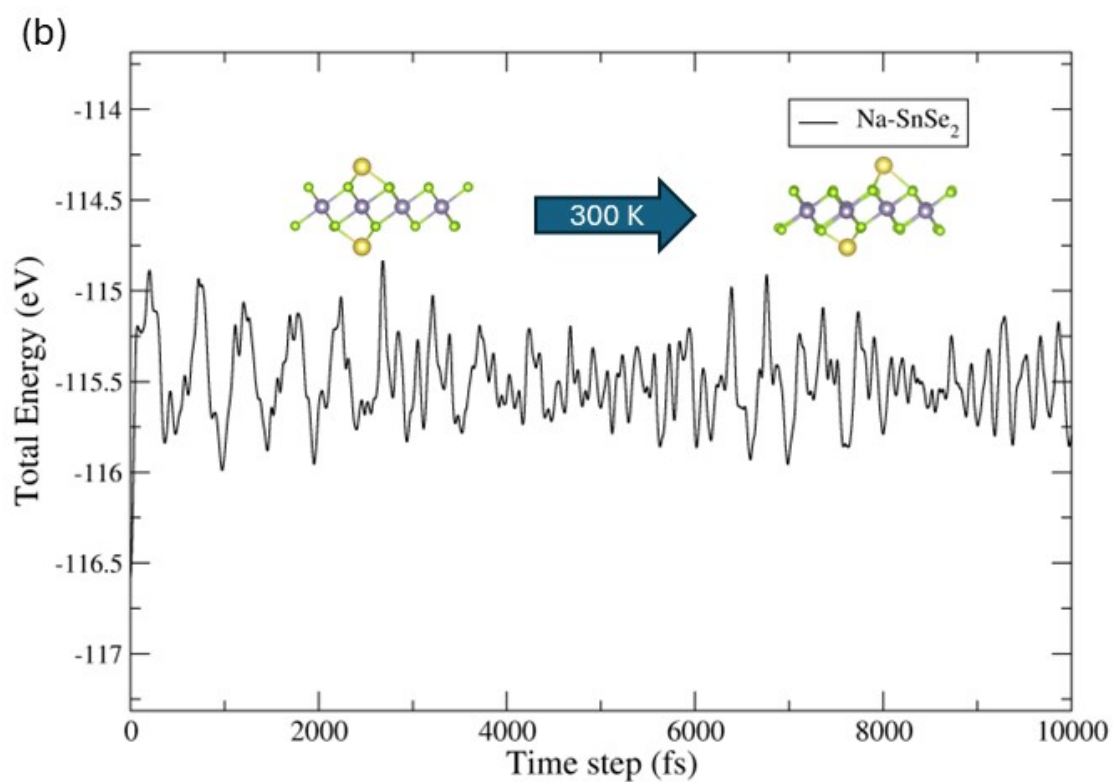

**Fig. S14** AIMD simulations for Na-SnS<sub>2</sub> (a) and Na-SnSe<sub>2</sub> (b) at 300 K under an external electric field of  $-0.5 \text{ V/\AA}$  showing stable energy fluctuation and preserved structural integrity over 10 ps.



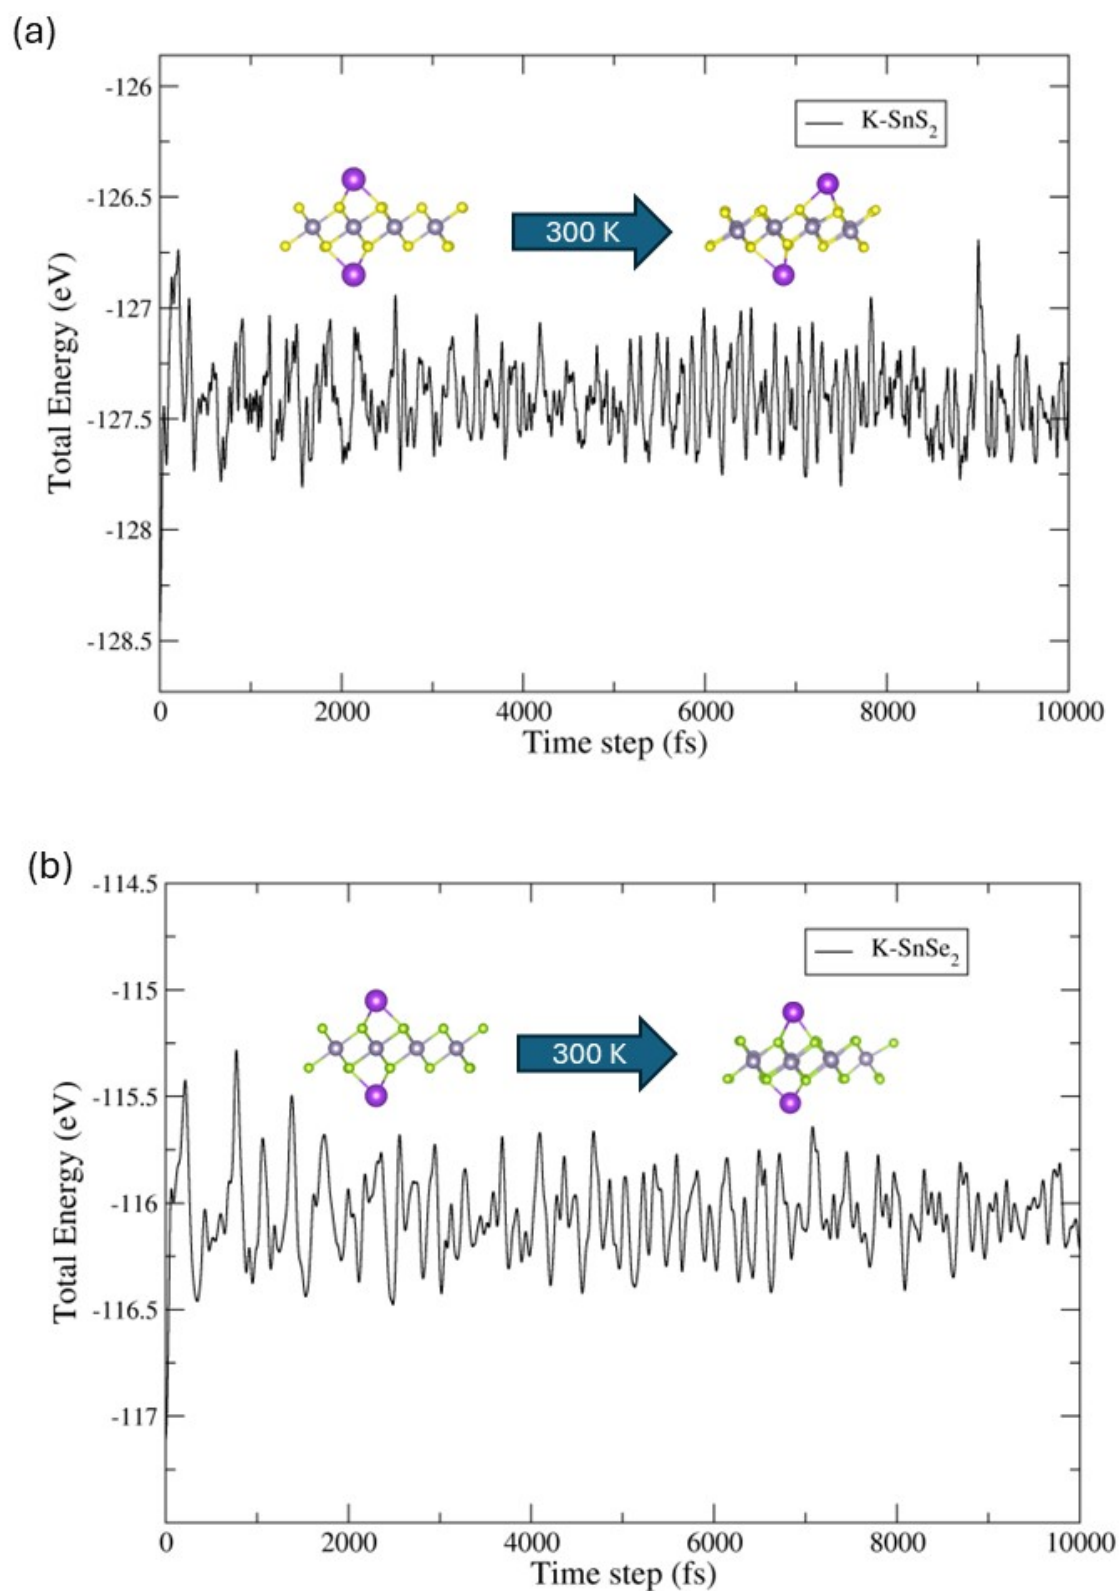

**Fig. S15** AIMD simulations for K-SnS<sub>2</sub> (a) and K-SnSe<sub>2</sub> (b) at 300 K under an external electric field of  $-0.5 \text{ V/\AA}$  showing stable energy fluctuation and preserved structural integrity over 10 ps.

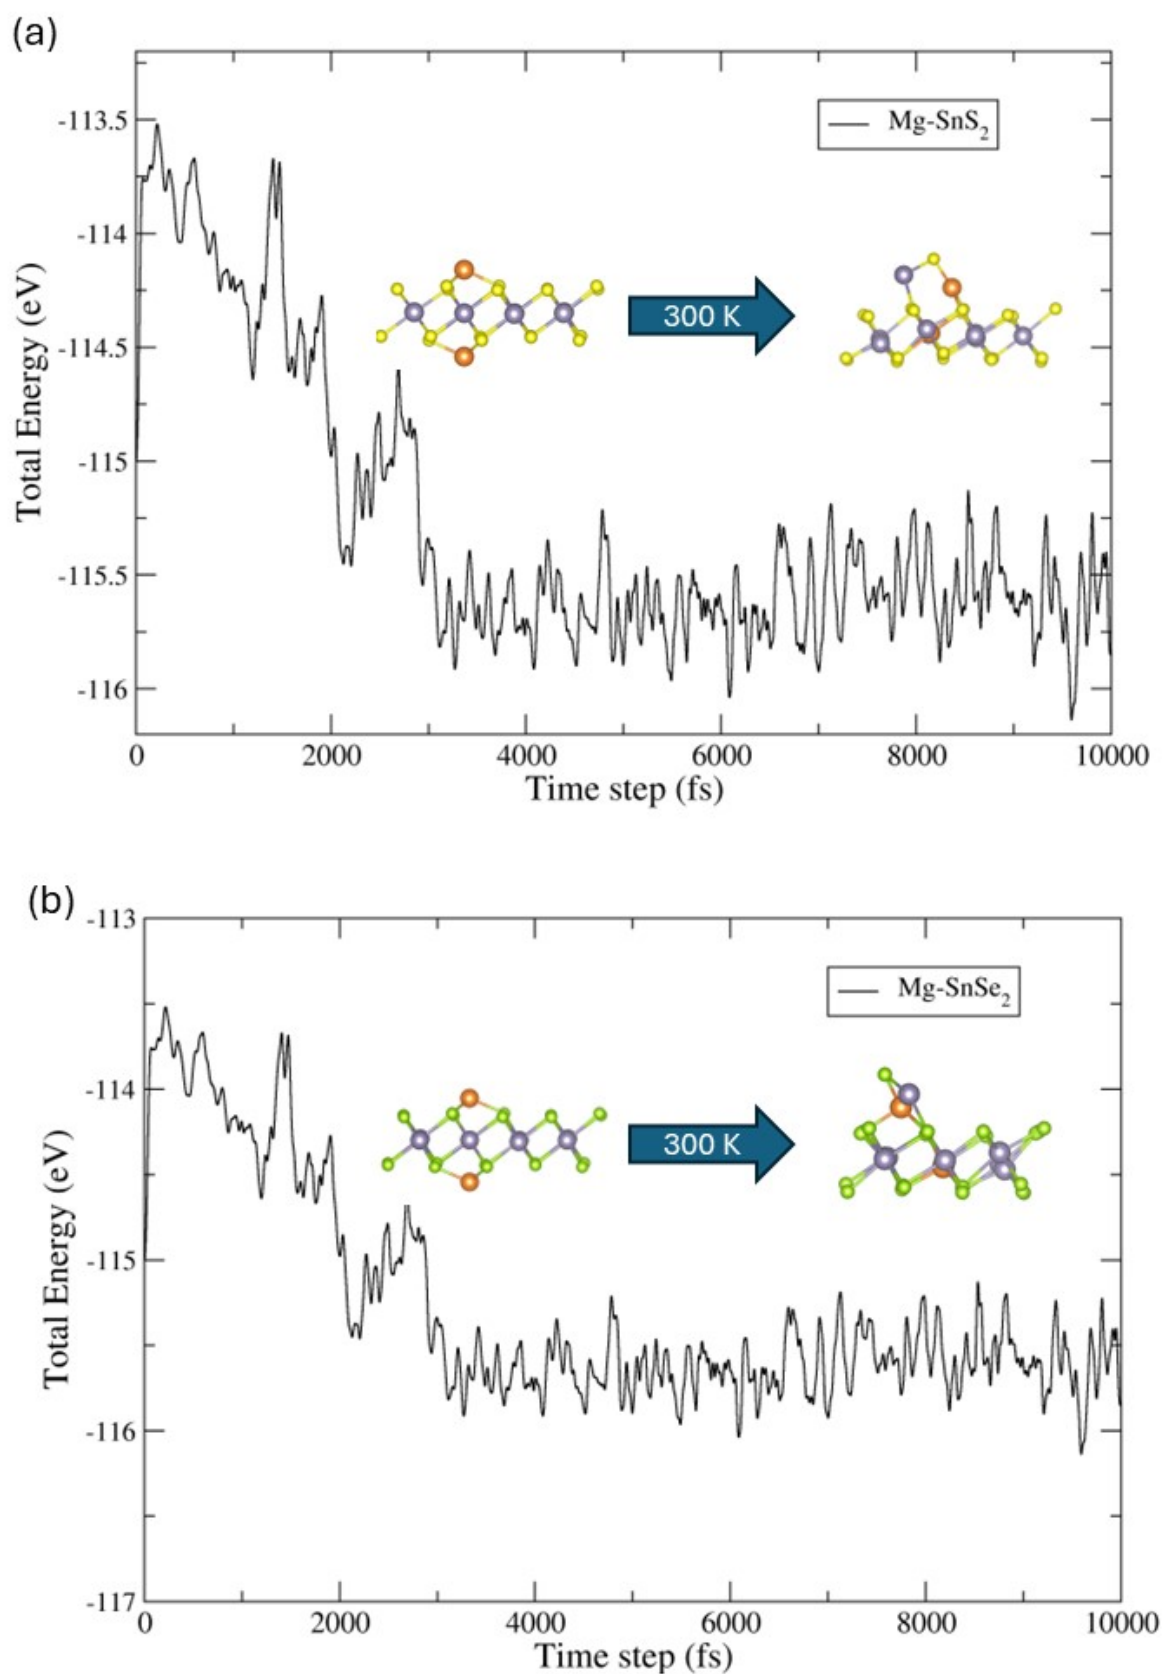

**Fig. S16** AIMD simulations for Mg-SnS<sub>2</sub> (a) and Mg-SnSe<sub>2</sub> (b) at 300 K under an external electric field of  $-0.5 \text{ V/\AA}$  showing unstable energy fluctuation and preserved structural integrity over 10 ps.

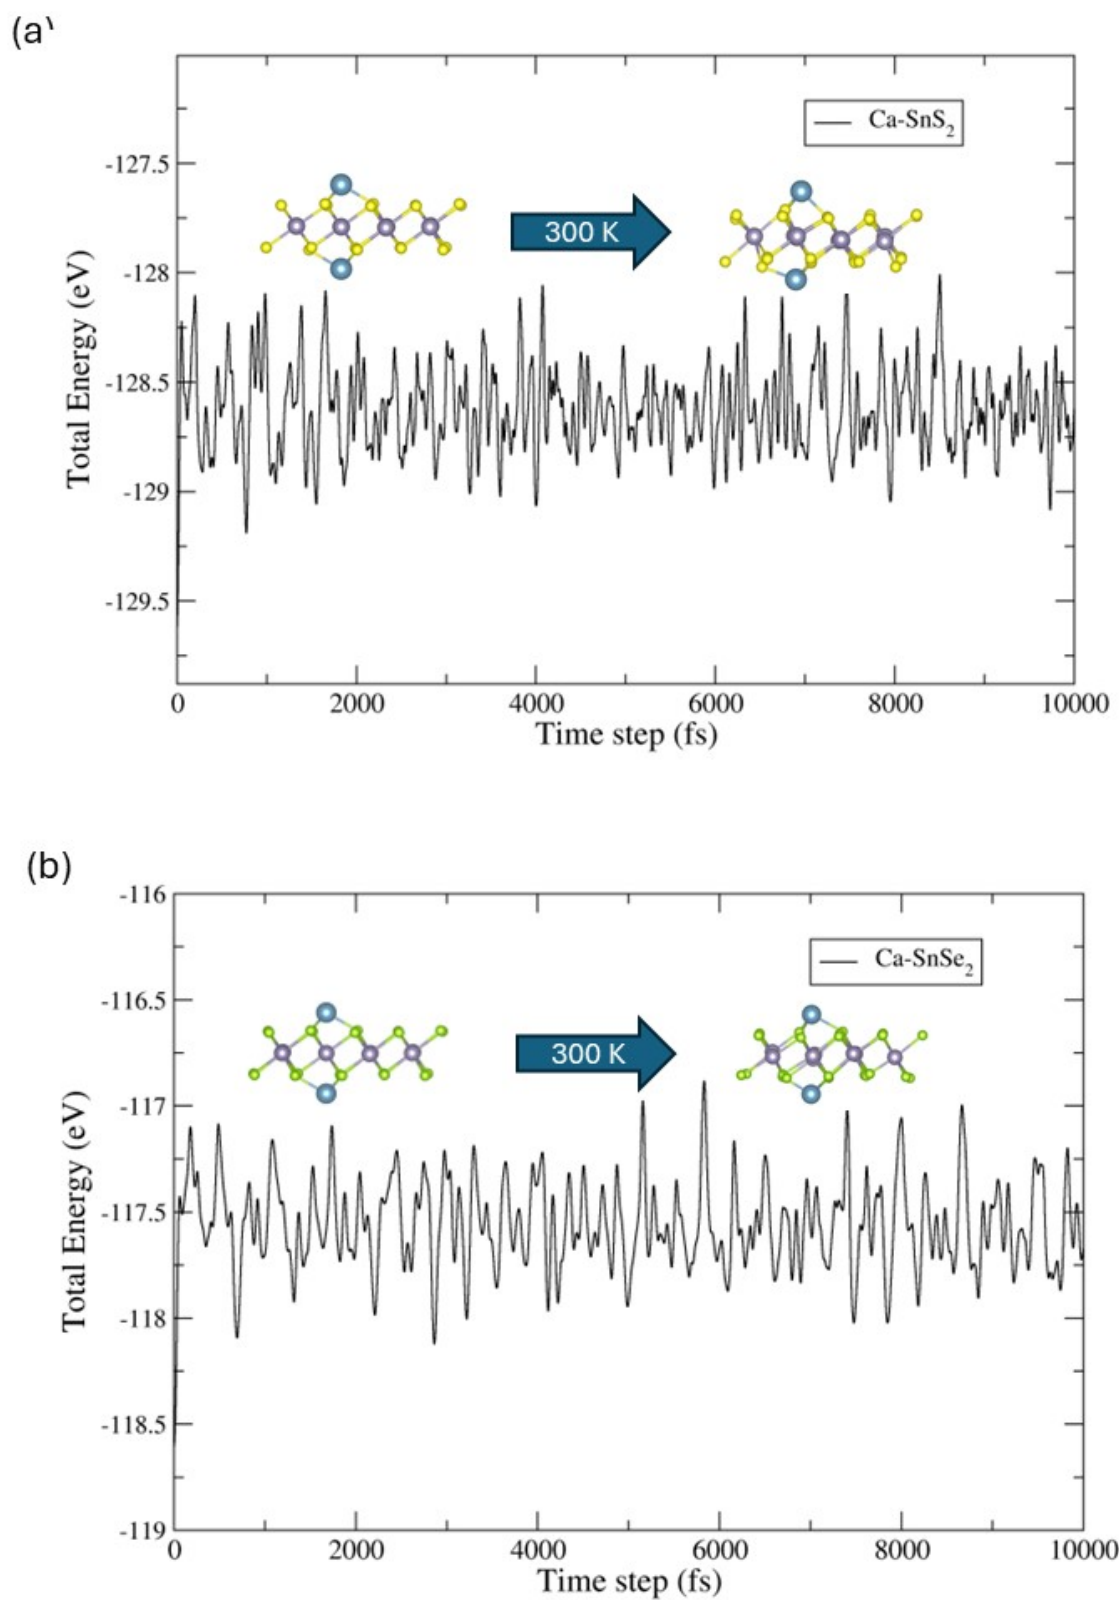

**Fig. S17** AIMD simulations for Ca-SnS<sub>2</sub> (a) and Ca-SnSe<sub>2</sub> (b) at 300 K under an external electric field of  $-0.5 \text{ V/\AA}$  showing stable energy fluctuation and preserved structural integrity over 10 ps.

### E. The maximum $H_2$ coverage configurations for other metal-SnX<sub>2</sub> systems and their Density of states

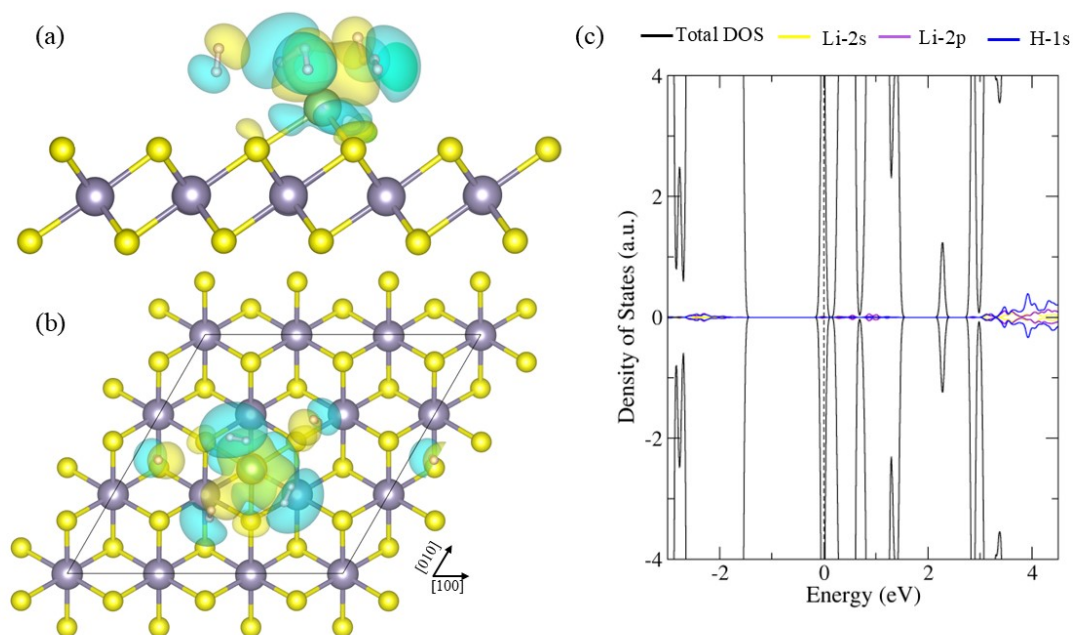

**Fig. S18** (a, b) Side and top views of the most stable Li-SnS<sub>2</sub> configuration at maximum H<sub>2</sub> coverage and (c) density of states of the same configuration.

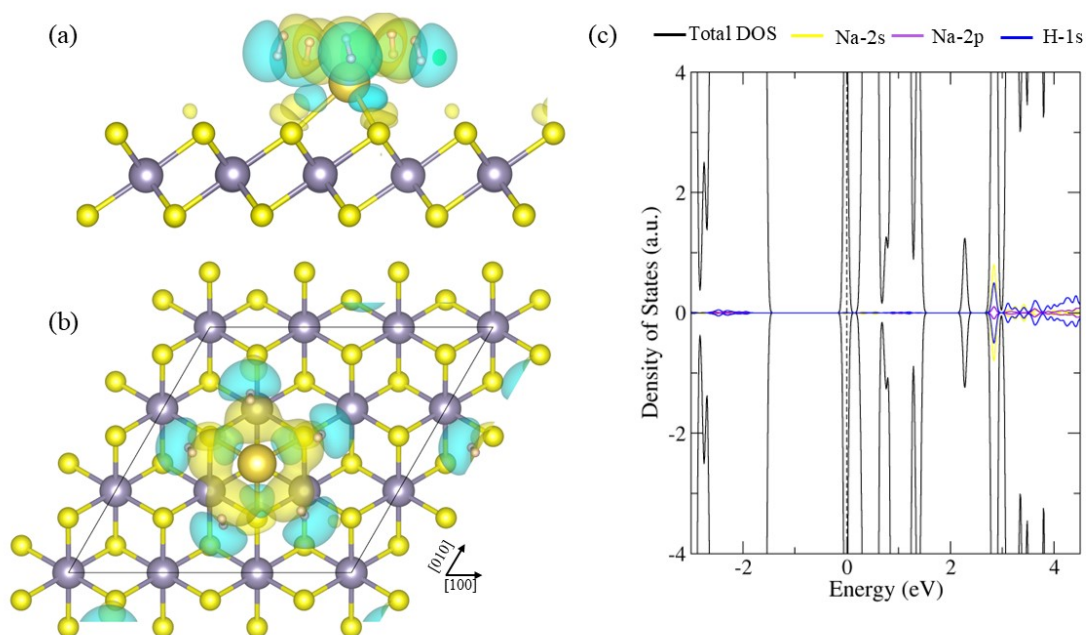

**Fig. S19** (a, b) Side and top views of the most stable Na-SnS<sub>2</sub> configuration at maximum H<sub>2</sub> coverage and (c) density of states of the same configuration.

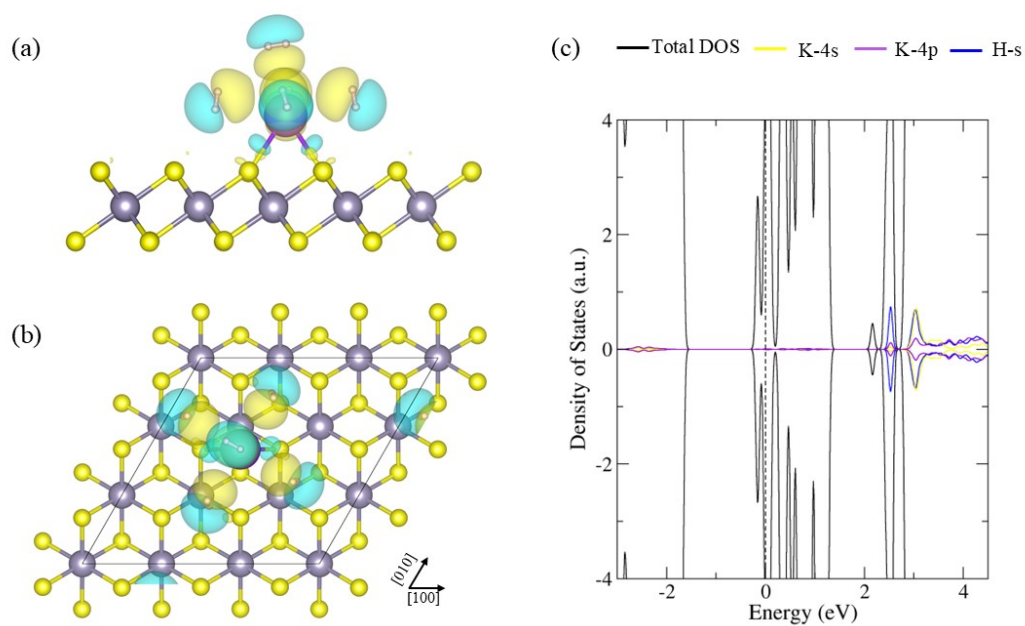

**Fig. S20** (a, b) Side and top views of the most stable K-SnS<sub>2</sub> configuration at maximum H<sub>2</sub> coverage and (c) density of states of the same configuration.

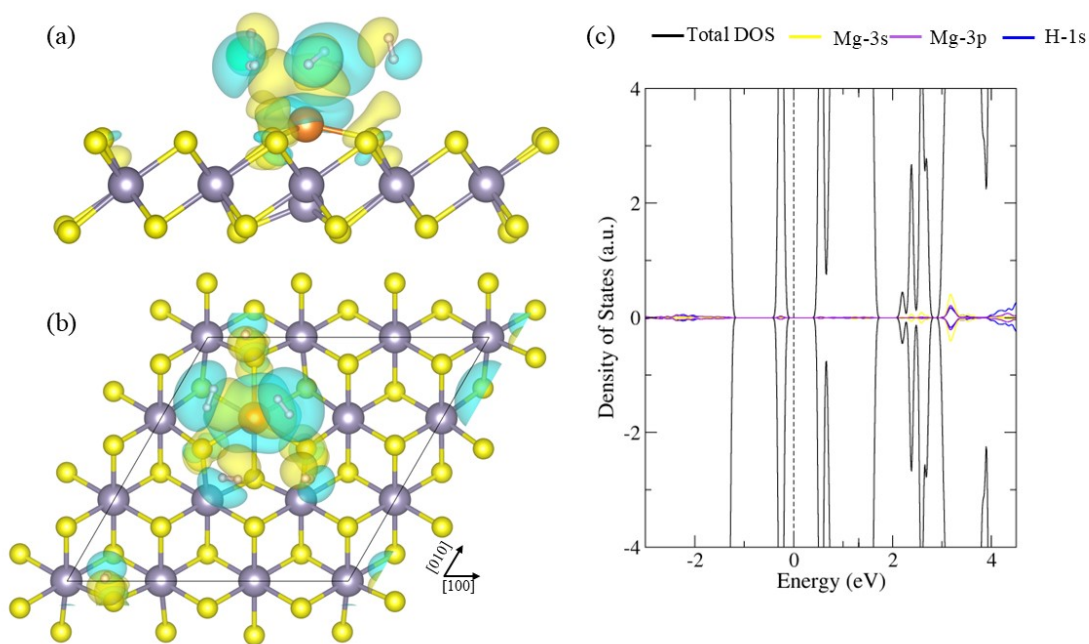

**Fig. S21** (a, b) Side and top views of the most stable Mg-SnS<sub>2</sub> configuration at maximum H<sub>2</sub> coverage and (c) density of states of the same configuration.



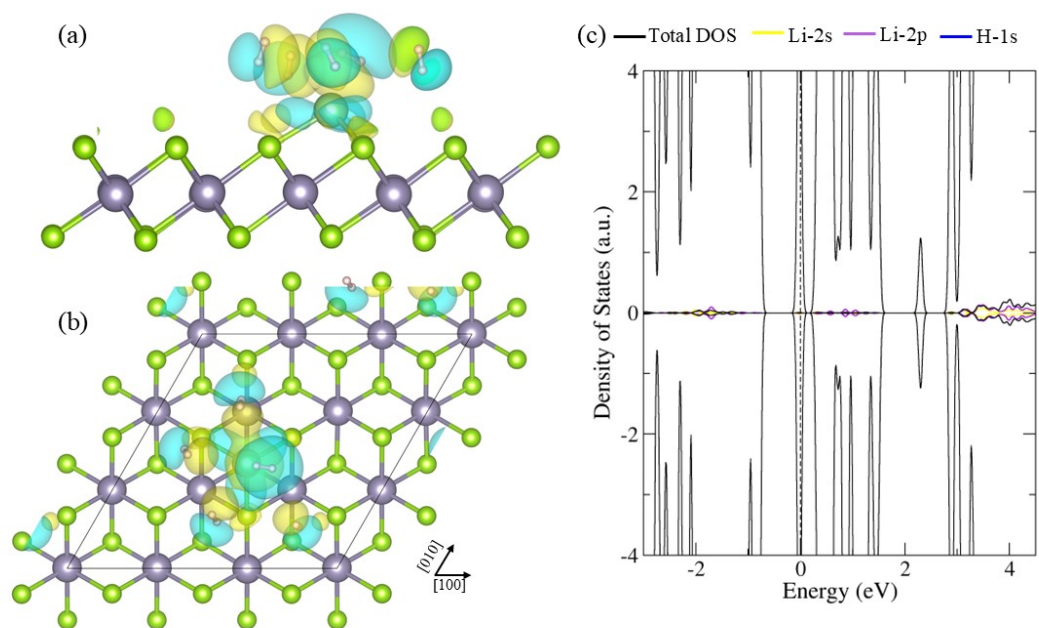

**Fig. S22** (a, b) Side and top views of the most stable Li-SnSe<sub>2</sub> configuration at maximum H<sub>2</sub> coverage and (c) density of states of the same configuration.

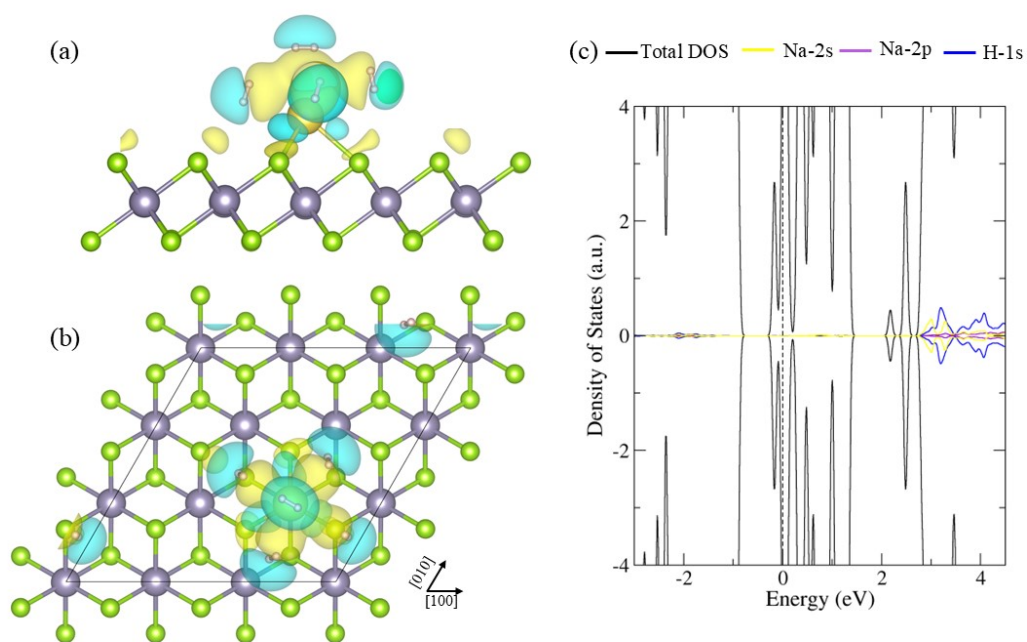

**Fig. S23** (a, b) Side and top views of the most stable Na-SnSe<sub>2</sub> configuration at maximum H<sub>2</sub> coverage and (c) density of states of the same configuration.

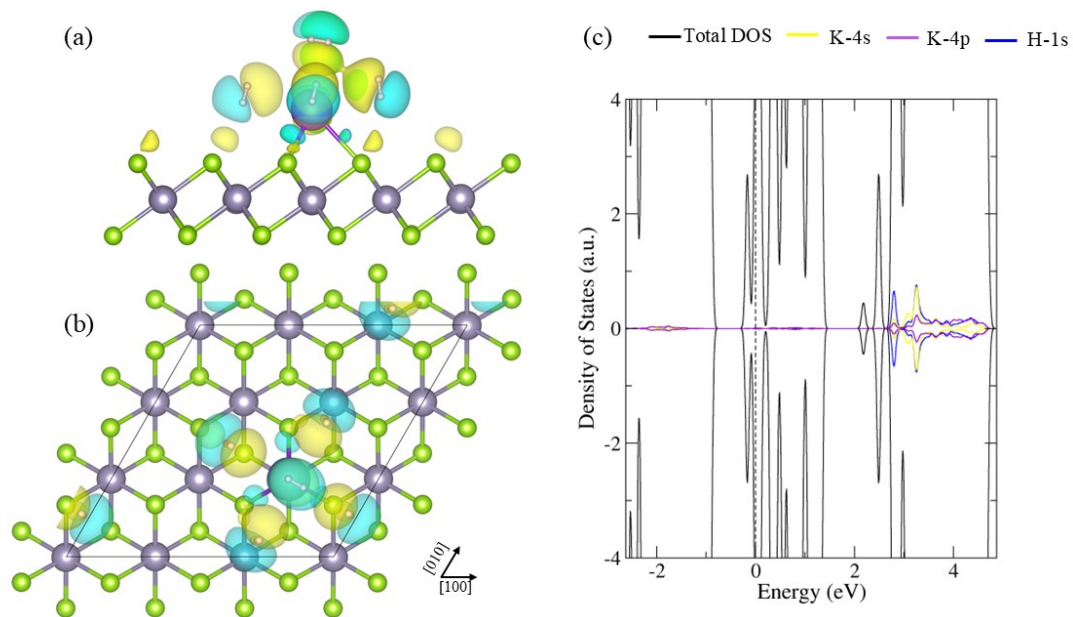

**Fig. S24** (a, b) Side and top views of the most stable K-SnSe<sub>2</sub> configuration at maximum H<sub>2</sub> coverage and (c) density of states of the same configuration.

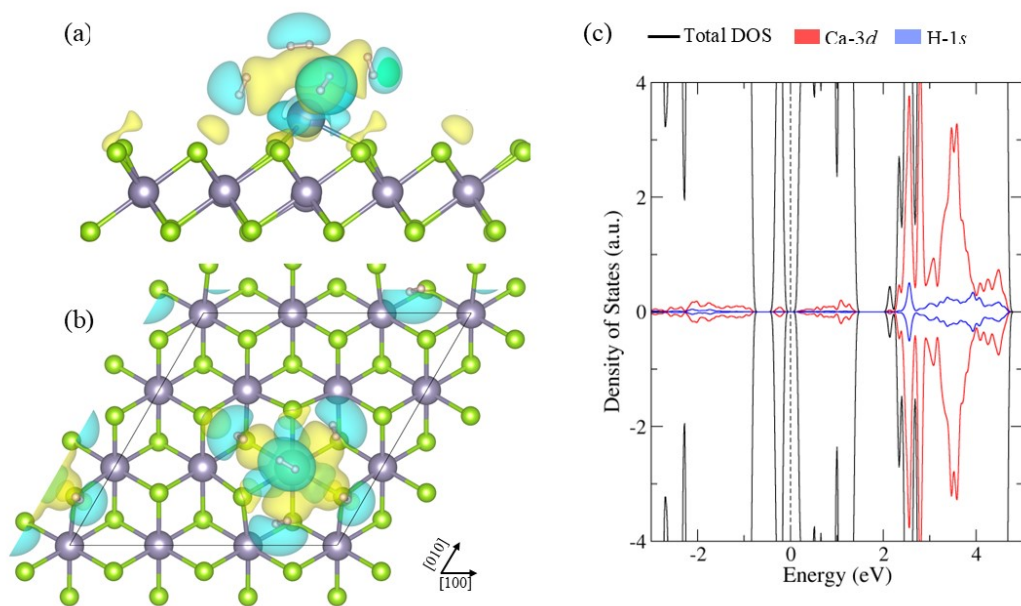

**Fig. S25** (a, b) Side and top views of the most stable Ca-SnSe<sub>2</sub> configuration at maximum H<sub>2</sub> coverage and (c) density of states of the same configuration.

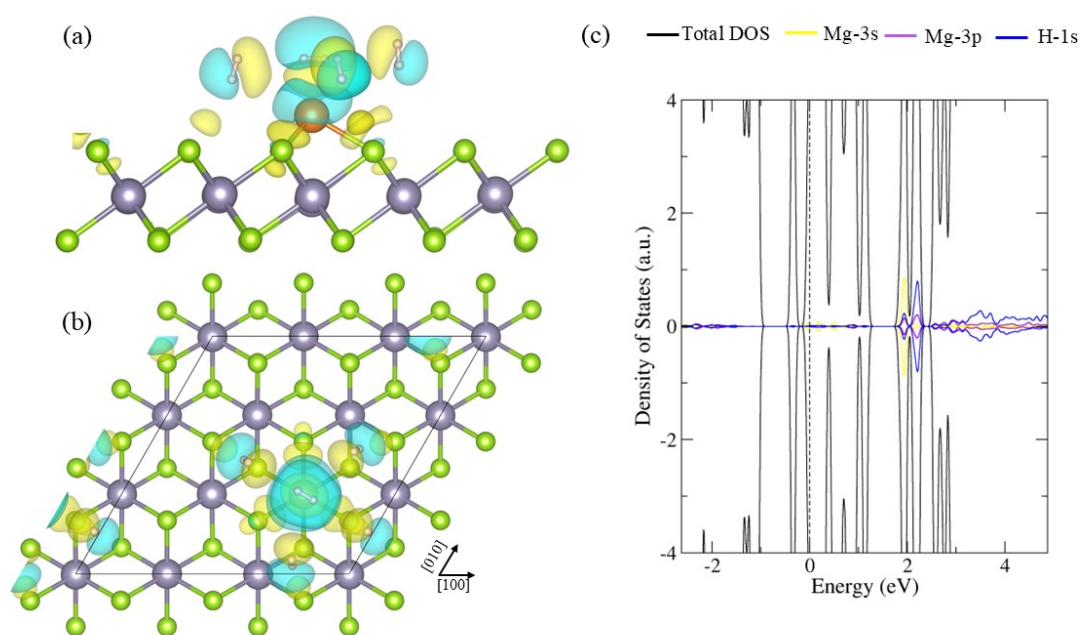

**Fig. S26** (a, b) Side and top views of the most stable Mg-SnSe<sub>2</sub> configuration at maximum H<sub>2</sub> coverage and (c) density of states of the same configuration.



## F. Numerical values of desorption temperatures

**Table S3** Desorption temperatures in Kelvin of Ca-decorated SnS<sub>2</sub> and SnSe<sub>2</sub> under different

| Number of H <sub>2</sub> | SnS <sub>2</sub> |        |        | SnSe <sub>2</sub> |        |        |
|--------------------------|------------------|--------|--------|-------------------|--------|--------|
|                          | 0.1              | 1      | 10     | 0.1               | 1      | 10     |
| 1-H <sub>2</sub>         | 166.85           | 200.64 | 246.10 | 149.37            | 179.68 | 222.62 |
| 2-H <sub>2</sub>         | 171.10           | 205.29 | 251.71 | 169.47            | 203.50 | 249.61 |
| 3-H <sub>2</sub>         | 171.10           | 205.29 | 251.71 | 166.96            | 200.76 | 246.24 |
| 4-H <sub>2</sub>         | 159.20           | 191.50 | 235.82 | 156.28            | 187.98 | 231.90 |
| 5-H <sub>2</sub>         | 141.35           | 170.02 | 211.84 | 139.97            | 168.37 | 209.99 |

pressures.

## References

- [1] E. Mohebbi, E. Pavoni, L. Pierantoni, P. Stipa, E. Laudadio, D. Mencarelli, Effect of different pseudopotentials on the phonon frequencies, dielectric constant, and Born effective charge of SnSe and SnSe<sub>2</sub> nanostructures: A density functional perturbation theory study, *Journal of Physics and Chemistry of Solids*, 185 (2024) 111755.
- [2] N.F. Martins, J.A.S. Laranjeira, K.A.L. Lima, L.A. Cabral, L.A. Ribeiro, J.R. Sambrano, HOP-graphene: A high-capacity anode for Li/Na-ion batteries unveiled by first-principles calculations, *Applied Surface Science*, 710 (2025) 163737.
